# Supplementary material
Source: PubMed Central journal article supplement (PMC4684263)
Supplement: NIHMS744555-supplement-Supplemetal_data.pdf [file NIHMS744555-supplement-Supplemetal_data.pdf]

## Supplemental Data

### Non-HDL-C Assays Show Improved Accuracy for Cardiovascular Risk Score

#### Classification Compared to Direct or Calculated LDL-C in a Dyslipidemic Population

Hendrick E. van Deventer, W. Greg Miller, Gary L. Myers, Ikunosuke Sakurabayashi, Lorin M. Bachmann, Samuel P. Caudill, Andrzej Dziekonski, Selvin Edwards, Mary M. Kimberly, William J. Korzun, Elizabeth T. Leary, Katsuyuki Nakajima, Masakazu Nakamura, Robert D. Shamburek, George W. Vetovec, G. Russell Warnick, Alan T. Remaley.

#### Classification into Cardiovascular disease risk score categories:

**LDL-C:** < 70 mg/dL, 71 to 100 mg/dL, 101 to 130 mg/dL, 131 to 160 mg/dL, 161 to 190 mg/dL, > 190 mg/dL

**Non-HDL-C:** <100 mg/dL, 101 to 130 mg/dL, 131 to 160 mg/dL, 161 to 190 mg/dL, 191 to 220 mg/dL, > 220 mg/dL

**HDL-C:** < 40 mg/dL, 40 to 60 mg/dL, > 60 mg/dL

**In case of apoA-I**, the following cutoff values were determined by linear regression analysis with rHDL-C, by calculating the equivalent points in the HDL-C probability distribution that corresponds to NCEP guidelines for HDL-C:

**ApoA-I:** < 136 mg/dL, 137 to 174 mg/dL and > 174 mg/dL

**In case of ApoB**, the following cutoff values were determined by linear regression analysis with rHDL-C, by calculating the equivalent points that corresponds to NCEP guidelines for LDL-C:

**ApoB:** < 77 mg/dL, 78 to 94 mg/dL, 95 to 110 mg/dL, 111 to 127 mg/dL, 128 to 143 mg/dL  
and >143 mg/dL

When apoB was compared to non-HDL-C that used rHDL-C in the calculation, the following apoB cut points were determined by linear regression analysis with non-HDL-C, by calculating the equivalent points that correspond to NCEP guidelines for non-HDL-C:

**ApoB:** < 79 mg/dL, 80 to 97 mg/dL, 98 to 115 mg/dL, 116 to 133 mg/dL, 134 to 152 mg/dL,  
>152 mg/dL

**Supplemental Figures:**

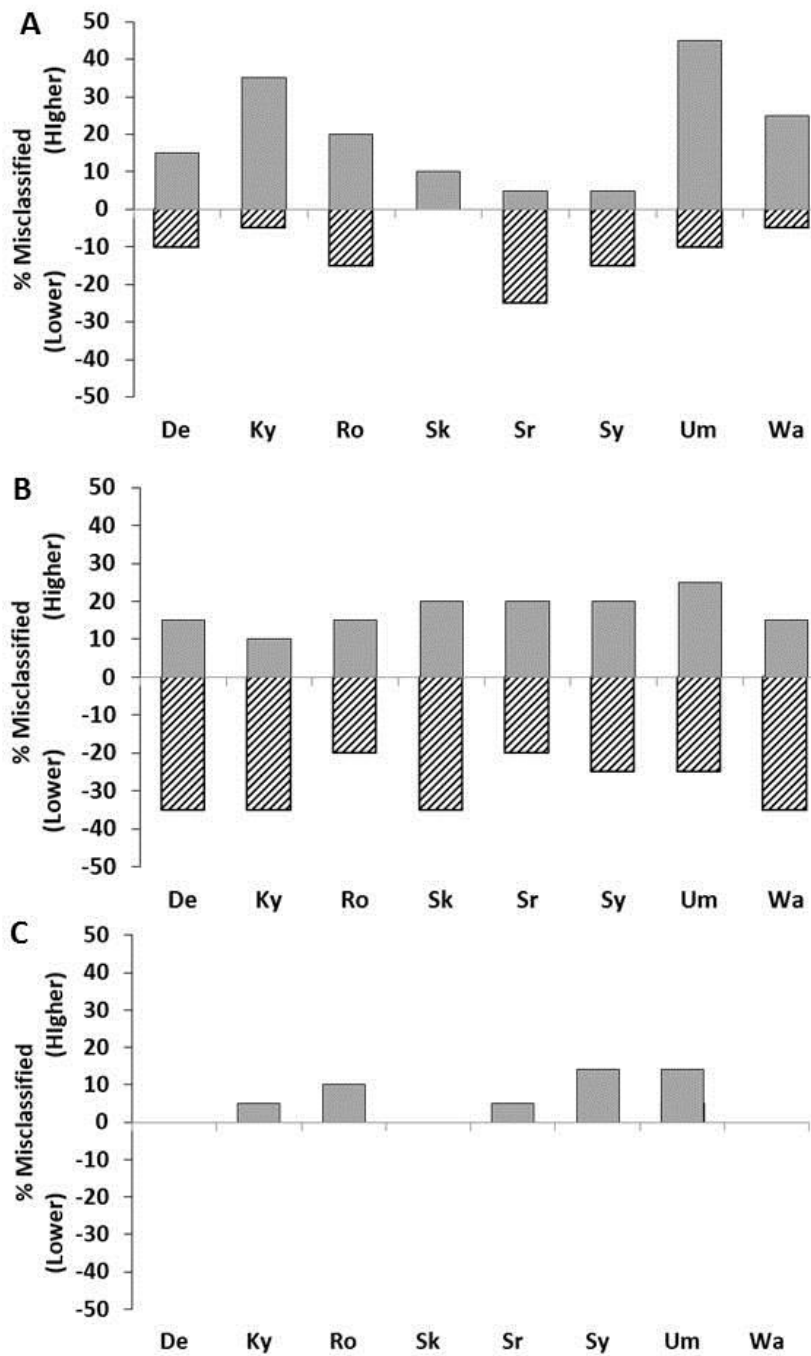

**Supplemental Fig. 1: Misclassification rate for CVD risk for those participants with TG  $\geq$  2.26 mmol/L (200 mg/dL) and  $<$  4.52 mmol/L (400mg/dL), N=20. Percent of test results that were classified into either a higher (open bar) or lower (solid bar) CVD risk category compared to RMPs are shown for dLDL-C (Panel A), cLDL-C (Panel B) or non-HDL-C (Panel C). (De, Denka; Ky, Kyowa; Ro, Roche; Sr, Serotec; Sk, Sekisui, Sy, Sysmex; Um, UMA; and Wa, Wako)**

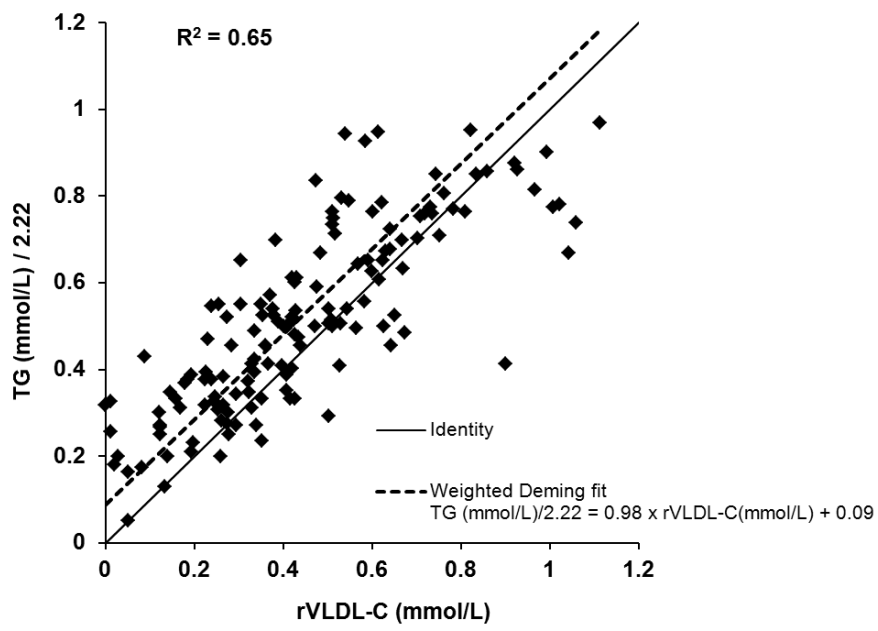

**Supplemental Fig. 2: Relationship between TG and VLDL-C.** Weighted Deming regression analysis of VLDL-C versus measured TG/2.22.

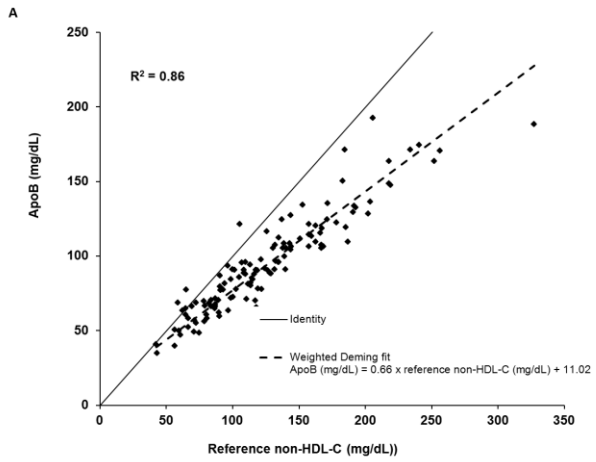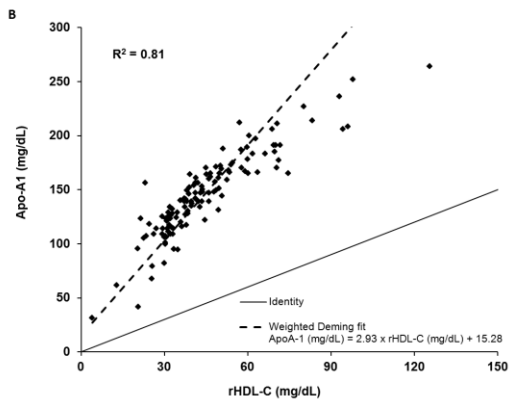

**Supplemental Fig. 3: Correlation of apolipoproteins with lipoprotein cholesterol values.**

**Panel A:** Weighted Deming regression analysis of apoB versus non-HDL-C.

**Panel B:** Weighted Deming regression analysis of apoA-1 vs rHDL-C.

## Supplemental Tables:

**Supplemental Table 1: Directly measured and calculated LDL-C vs. rLDL-C for all participants (N = 28) with Triglycerides  $\geq 2.26$  mmol/L (200 mg/dL) including 7 with TG  $>4.52$  ( $>400$ mg/dL).**

| dLDL-C versus rLDL-C (TG $\geq 2.26$ mmol/L (200 mg/dL)) (N=27) |                         |                         |                         |                         |                         |                         |                         |                         |
|-----------------------------------------------------------------|-------------------------|-------------------------|-------------------------|-------------------------|-------------------------|-------------------------|-------------------------|-------------------------|
|                                                                 | Denka                   | Kyowa                   | Roche                   | Sekisui                 | Serotec                 | Sysmex                  | UMA                     | Wako                    |
| R <sup>2</sup>                                                  | 0.93                    | 0.78                    | 0.78                    | 0.97                    | 0.79                    | 0.78                    | 0.75                    | 0.82                    |
| S y x mmol/L                                                    | 0.18                    | 0.52                    | 0.48                    | 0.16                    | 0.40                    | 0.35                    | 0.47                    | 0.34                    |
| Slope (95 % CI)                                                 | 0.97 (0.84 to 1.11)     | 1.34 (1.09 to 1.59)*    | 1.25 (1.02 to 1.48)*    | 0.96 (0.82 to 1.10)     | 1.13 (0.93 to 1.33)     | 1.02 (0.88 to 1.15)     | 1.33 (1.11 to 1.56)     | 0.91 (0.73 to 1.10)     |
| Intercept (95 % CI) mmol/L                                      | 0.08 (-0.22 to 0.38)    | -0.74 (-1.20 to -0.27)* | -0.65 (-1.09 to -0.21)* | 0.21 (-0.20 to 0.62)    | -0.74 (-1.05 to -0.43)  | -0.10 (-0.46 to 0.27)   | -0.70 (-1.06 to -0.34)  | 0.33 (-0.26 to 0.92)    |
| % observed agreement (95 % CI), Kappa                           | 70% (50 to 86), 0.62    | 63% (42 to 81), 0.54    | 67% (46 to 83), 0.58    | 81% (62 to 94), 0.76    | 67% (46 to 83), 0.57    | 81% (62 to 94), 0.76    | 52% (32 to 71), 0.40    | 67% (46 to 83), 0.57    |
| % in Lower/Higher Risk category                                 | 11 / 19 %               | 7 / 30 %                | 15 / 19 %               | 0 / 19 %                | 30 / 4 %                | 15 / 4 %                | 11 / 37 %               | 7 / 26 %                |
| % Exceeding TE Goal                                             | 19 %                    | 37 %                    | 26 %                    | 11 %                    | 52 %                    | 19 %                    | 48 %                    | 41 %                    |
| cLDL-C versus rLDL-C (TG $\geq 2.26$ mmol/L (200 mg/dL)) (N=27) |                         |                         |                         |                         |                         |                         |                         |                         |
|                                                                 | Denka                   | Kyowa                   | Roche                   | Sekisui                 | Serotec                 | Sysmex                  | UMA                     | Wako                    |
| R <sup>2</sup>                                                  | 0.84                    | 0.84                    | 0.85                    | 0.84                    | 0.82                    | 0.85                    | 0.83                    | 0.82                    |
| S y x mmol/L                                                    | 0.23                    | 0.23                    | 0.24                    | 0.24                    | 0.24                    | 0.25                    | 0.24                    | 0.24                    |
| Slope (95 % CI)                                                 | 1.23 (1.06 to 1.40)*    | 1.26 (1.09 to 1.43)*    | 1.28 (1.11 to 1.46)*    | 1.27 (1.09 to 1.45)*    | 1.28 (1.10 to 1.46)*    | 1.29 (1.10 to 1.47)*    | 1.29 (1.11 to 1.47)*    | 1.19 (1.02 to 1.37)*    |
| Intercept (95 % CI) mmol/L                                      | -0.85 (-1.18 to -0.52)* | -0.87 (-1.21 to -0.53)* | -0.89 (-1.23 to -0.55)* | -0.88 (-1.22 to -0.54)* | -0.89 (-1.23 to -0.54)* | -0.89 (-1.23 to -0.55)* | -0.89 (-1.24 to -0.55)* | -0.83 (-1.16 to -0.50)* |
| % observed agreement (95 % CI), Kappa                           | 56 (35 to 75), 0.43     | 63 (42 to 81), 0.52     | 70 (50 to 86), 0.62     | 56 (35 to 75), 0.43     | 63 (42 to 81), 0.52     | 59 (39 to 78), 0.48     | 59 (39 to 78), 0.48     | 52 (32 to 71), 0.38     |
| % in Lower/Higher Risk category                                 | 33 / 11 %               | 30 / 7 %                | 19 / 11 %               | 30 / 15 %               | 22 / 15 %               | 26 / 15 %               | 22 / 19 %               | 37 / 11 %               |
| % Exceeding TE Goal                                             | 56 %                    | 56 %                    | 56 %                    | 63 %                    | 56 %                    | 48 %                    | 56 %                    | 63 %                    |



**Supplemental Table 3: rLDL-C, dLDL-C and cLDL-C vs. ApoB**

| <b>rLDL-C and dLDL-C versus ApoB (All Participants) (N=126)</b>                 |                                |                           |                           |                           |                           |                           |                           |                           |                           |
|---------------------------------------------------------------------------------|--------------------------------|---------------------------|---------------------------|---------------------------|---------------------------|---------------------------|---------------------------|---------------------------|---------------------------|
|                                                                                 | <b>rLDL-C<br/>(N=125)</b>      | <b>Denka</b>              | <b>Kyowa</b>              | <b>Roche</b>              | <b>Sekisui</b>            | <b>Serotec</b>            | <b>Sysmex</b>             | <b>UMA</b>                | <b>Wako</b>               |
| R <sup>2</sup>                                                                  | 0.56                           | 0.60                      | 0.57                      | 0.58                      | 0.60                      | 0.55                      | 0.56                      | 0.47                      | 0.61                      |
| S <sub>yx</sub> mg/dL                                                           | 0.32                           | 0.33                      | 0.33                      | 0.31                      | 0.31                      | 0.30                      | 0.34                      | 0.39                      | 0.27                      |
| Slope (95 % CI)                                                                 | 1.25 (1.09 to 1.41)            | 1.31 (1.15 to 1.48)       | 1.28 (1.13 to 1.43)       | 1.21 (1.08 to 1.35)       | 1.27 (1.11 to 1.43)       | 1.15 (1.00 to 1.30)       | 1.27 (1.11 to 1.44)       | 1.29 (1.09 to 1.50)       | 1.21 (1.07 to 1.35)       |
| Intercept (95 % CI) mg/dL                                                       | -16.81 (-28.88 to -4.73)       | -23.08 (-35.60 to -10.56) | -20.80 (-32.07 to -9.54)  | -19.38 (-29.43 to -9.33)  | -19.81 (-32.27 to -7.34)  | -17.67 (-29.28 to -6.06)  | -25.71 (-38.03 to -13.39) | -23.17 (-40.64 to -5.71)  | -10.66 (-20.35 to -0.96)  |
| % observed agreement (95 % CI), Kappa                                           | 62% (53 to 70), 0.51           | 60% (50 to 68), 0.49      | 62% (53 to 70), 0.52      | 67% (58 to 75), 0.57      | 64% (54 to 72), 0.53      | 60% (50 to 68), 0.47      | 65% (56 to 73), 0.55      | 57% (48 to 66), 0.45      | 63% (54 to 71), 0.53      |
| % in Lower/Higher Risk category                                                 | 17 / 22 %                      | 15 / 25 %                 | 18 / 20 %                 | 21 / 12 %                 | 17 / 19 %                 | 29 / 12 %                 | 21 / 13 %                 | 21 / 22 %                 | 15 / 22 %                 |
| <b>rLDL-C and dLDL-C versus ApoB ((TG &lt; 2.26 mmol/L (200 mg/dL)) (N=102)</b> |                                |                           |                           |                           |                           |                           |                           |                           |                           |
|                                                                                 | <b>rLDL-C</b>                  | <b>Denka</b>              | <b>Kyowa</b>              | <b>Roche</b>              | <b>Sekisui</b>            | <b>Serotec</b>            | <b>Sysmex</b>             | <b>UMA</b>                | <b>Wako</b>               |
| R <sup>2</sup>                                                                  | 0.88                           | 0.90                      | 0.88                      | 0.88                      | 0.89                      | 0.85                      | 0.85                      | 0.74                      | 0.89                      |
| S <sub>yx</sub> mg/dL                                                           | 0.16                           | 0.17                      | 0.17                      | 0.17                      | 0.17                      | 0.18                      | 0.20                      | 0.27                      | 0.15                      |
| Slope (95 % CI)                                                                 | 1.37 (1.26 to 1.49)            | 1.43 (1.32 to 1.54)       | 1.37 (1.26 to 1.49)       | 1.30 (1.21 to 1.40)       | 1.39 (1.27 to 1.50)       | 1.27 (1.16 to 1.37)       | 1.38 (1.26 to 1.51)       | 1.36 (1.20 to 1.52)       | 1.33 (1.23 to 1.43)       |
| Intercept (95 % CI) mg/dL                                                       | -20.05 (-29.06 to -11.05)      | -25.71 (-34.98 to -16.44) | -21.93 (-30.03 to -13.84) | -21.35 (-28.73 to -3.97)  | -22.96 (-32.58 to -13.34) | -20.75 (-28.96 to -12.53) | -28.64 (-38.87 to -18.41) | -22.69 (-35.86 to -9.51)  | -14.94 (-22.54 to -7.33)  |
| % observed agreement (95 % CI), Kappa                                           | 66% (56 to 75), 0.56           | 63% (53 to 72), 0.52      | 67% (57 to 76), 0.57      | 73% (63 to 81), 0.64      | 66% (56 to 75), 0.55      | 68% (58 to 77), 0.57      | 72% (62 to 80), 0.62      | 63% (53 to 72), 0.51      | 66% (58 to 74), 0.55      |
| % in Lower/Higher Risk category                                                 | 8 / 26 %                       | 7 / 30 %                  | 11 / 23 %                 | 14 / 14 %                 | 11 / 24 %                 | 19 / 14 %                 | 13 / 16 %                 | 13 / 25 %                 | 3 / 31 %                  |
| <b>cLDL-C* versus ApoB (mg/dL) (TG &lt; 2.26 mmol/L (200 mg/dL)) (N=102)</b>    |                                |                           |                           |                           |                           |                           |                           |                           |                           |
|                                                                                 | <b>cLDL<br/>(rHDL-C)<br/>#</b> | <b>Denka</b>              | <b>Kyowa</b>              | <b>Roche</b>              | <b>Sekisui</b>            | <b>Serotec</b>            | <b>Sysmex</b>             | <b>UMA</b>                | <b>Wako</b>               |
| R <sup>2</sup>                                                                  | 0.85                           | 0.86                      | 0.86                      | 0.86                      | 0.85                      | 0.86                      | 0.85                      | 0.85                      | 0.84                      |
| S <sub>yx</sub> mg/dL                                                           | 0.21                           | 0.19                      | 0.20                      | 0.20                      | 0.20                      | 0.20                      | 0.21                      | 0.22                      | 0.22                      |
| Slope (95 % CI)                                                                 | 1.44 (1.30 to 1.59)            | 1.38 (1.24 to 1.52)       | 1.42 (1.27 to 1.56)       | 1.43 (1.28 to 1.58)       | 1.43 (1.28 to 1.57)       | 1.44 (1.28 to 1.59)       | 1.45 (1.30 to 1.60)       | 1.45 (1.28 to 1.62)       | 1.45 (1.30 to 1.61)       |
| Intercept (95 % CI) mg/dL                                                       | -30.19 (-42.24 to -18.13)      | -24.80 (-36.39 to -13.22) | -28.78 (-41.14 to -16.43) | -27.46 (-40.01 to -14.92) | -26.19 (-38.26 to -14.11) | -27.69 (-40.25 to -15.13) | -26.72 (-39.09 to -14.35) | -31.81 (-46.26 to -17.35) | -34.21 (-47.25 to -21.17) |
| % observed agreement (95 % CI), Kappa                                           | 65% (55 to 74), 0.54           | 73% (63 to 81), 0.64      | 72% (62 to 90), 0.63      | 64% (54 to 73), 0.53      | 64% (54 to 73), 0.53      | 65% (55 to 74), 0.55      | 62% (52 to 71), 0.51      | 65% (55 to 74), 0.54      | 69% (59 to 77), 0.58      |
| % in Lower/Higher Risk category                                                 | 12 / 24 %                      | 8 / 20 %                  | 10 / 19 %                 | 8 / 28 %                  | 8 / 28 %                  | 7 / 28 %                  | 7 / 31 %                  | 12 / 24 %                 | 15 / 17 %                 |

\*cLDL-C was calculated using direct HDL-C from each indicated manufacturer, #cLDL-C calculated using reference HDL-C



**Supplemental Table 4: Apo-B vs. Non-HDL-Cholesterol**

| non-HDL-C (mg/dL) versus apo-B (mg/dL) (N=126) |                            |                          |                         |                          |                          |                          |                          |                          |                           |
|------------------------------------------------|----------------------------|--------------------------|-------------------------|--------------------------|--------------------------|--------------------------|--------------------------|--------------------------|---------------------------|
|                                                | Non-HDL-C (rHDL-C) (N=125) | Denka                    | Kyowa                   | Roche                    | Sekisui                  | Serotec                  | Sysmex                   | UMA                      | Wako                      |
| R <sup>2</sup>                                 | 0.86                       | 0.84                     | 0.84                    | 0.84                     | 0.84                     | 0.84                     | 0.84                     | 0.83                     | 0.83                      |
| S <sub>yx</sub> mg/dL                          | 0.17                       | 0.17                     | 0.18                    | 0.18                     | 0.18                     | 0.19                     | 0.18                     | 0.20                     | 0.20                      |
| Slope (95 % CI)                                | 1.51 (1.40 to 1.62)        | 1.47 (1.35 to 1.59)      | 1.53 (1.40 to 1.66)     | 1.52 (1.40 to 1.65)      | 1.50 (1.39 to 1.62)      | 1.53 (1.40 to 1.67)      | 1.52 (1.40 to 1.64)      | 1.58 (1.42 to 1.75)      | 1.54 (1.41 to 1.68)       |
| Intercept (95 % CI)                            | -16.64 (-25.88 to -7.40)   | -12.97 (-22.46 to -3.47) | -18.54 (-29.4 to -7.68) | -15.79 (-26.48 to -5.10) | -13.35 (-22.99 to -3.72) | -16.43 (-27.48 to -5.39) | -13.19 (-23.14 to -3.24) | -23.40 (-37.42 to -9.39) | -22.44 (-34.18 to -10.70) |
| % observed agreement (95 % CI), Kappa          | 69% (60 to 77), 0.59       | 67% (59 to 76), 0.58     | 67% (59 to 76), 0.58    | 66% (57 to 74), 0.56     | 66% (57 to 74), 0.56     | 64% (55 to 73), 0.54     | 66% (57 to 74), 0.56     | 65% (56 to 73), 0.55     | 67% (59 to 76), 0.57      |
| % Categorized in Lower / Higher HDL-C category | 13 / 18 %                  | 13 / 19 %                | 13 / 19 %               | 11 / 23 %                | 13 / 21 %                | 13 / 23 %                | 10 / 24 %                | 15 / 20 %                | 17 / 15 %                 |

**Supplemental Table 5: ApoA-1 vs. HDL-C for all patients**

| dHDL-C (mg/dL) versus apoA-1 (mg/dL) (N=130)   |                        |                         |                       |                       |                         |                       |                       |                        |                       |
|------------------------------------------------|------------------------|-------------------------|-----------------------|-----------------------|-------------------------|-----------------------|-----------------------|------------------------|-----------------------|
|                                                | rHDL-C (N=129)         | Denka                   | Kyowa                 | Roche                 | Sekisui                 | Serotec               | Sysmex                | UMA                    | Wako                  |
| R <sup>2</sup>                                 | 0.81                   | 0.82                    | 0.78                  | 0.78                  | 0.83                    | 0.72                  | 0.81                  | 0.66                   | 0.74                  |
| S <sub>yx</sub> mg/dL                          | 0.09                   | 0.08                    | 0.09                  | 0.09                  | 0.08                    | 0.12                  | 0.10                  | 0.13                   | 0.10                  |
| Slope (95% CI)                                 | 0.34 (0.29 to 0.40)    | 0.35 (0.31 to 0.40)     | 0.34 (0.30 to 0.38)   | 0.32 (0.28 to 0.35)   | 0.34 (0.30 to 0.39)     | 0.27 (0.19 to 0.34)   | 0.26 (0.18 to 0.34)   | 0.36 (0.31 to 0.41)    | 0.26 (0.14 to 0.39)   |
| Intercept (95 % CI)                            | -5.21 (-12.88 to 2.46) | -6.69 (-12.69 to -0.69) | -4.39 (-9.70 to 0.93) | -3.39 (-8.42 to 1.63) | -7.72 (-14.13 to -1.30) | 3.85 (-7.42 to 15.12) | 2.72 (-8.40 to 13.85) | -7.25 (-13.81 to 0.70) | 9.24 (-8.28 to 26.75) |
| % observed agreement (95 % CI), Kappa          | 81% (74 to 88), 0.70   | 76% (68 to 83), 0.62    | 75% (67 to 83), 0.61  | 75% (67 to 83), 0.61  | 74% (65 to 81), 0.58    | 74% (65 to 81), 0.58  | 71% (62 to 78), 0.53  | 72% (63 to 79), 0.56   | 80% (72 to 87), 0.69  |
| % Categorized in Lower / Higher HDL-C category | 13 / 5 %               | 17 / 7 %                | 15 / 9 %              | 21 / 4 %              | 22 / 4 %                | 22 / 5 %              | 26 / 3 %              | 18 / 10 %              | 7 / 13 %              |

**Supplemental Table 6: Directly measured and calculated LDL-C vs. rLDL-C , Fasting and non-fasting**

| Fasting (> 12 hours): dLDL-C versus rLDL-C (TG < 2.26 mmol/L (200 mg/dL)) (N=85)     |                        |                        |                        |                       |                        |                       |                        |                        |
|--------------------------------------------------------------------------------------|------------------------|------------------------|------------------------|-----------------------|------------------------|-----------------------|------------------------|------------------------|
|                                                                                      | Denka                  | Kyowa                  | Roche                  | Sekisui               | Serotec                | Sysmex                | UMA                    | Wako                   |
| R <sup>2</sup>                                                                       | 0.97                   | 0.98                   | 0.98                   | 0.99                  | 0.97                   | 0.97                  | 0.89                   | 0.99                   |
| S <sub>YX</sub> mmol/L                                                               | 0.09                   | 0.08                   | 0.08                   | 0.07                  | 0.08                   | 0.11                  | 0.16                   | 0.05                   |
| Slope (95 % CI) mmol/L                                                               | 0.99 (0.92 to 1.07)    | 1.01 (0.97 to 1.04)    | 0.94 (0.89 to 1.00)    | 0.99 (0.96 to 1.02)   | 0.91 (0.83 to 1.00)    | 0.91 (0.72 to 1.11)   | 1.00 (0.88 to 1.12)    | 1.00 (0.94 to 1.05)    |
| Intercept (95 % CI) mmol/L                                                           | -0.04 (-0.20 to 0.12)  | -0.06 (-0.12 to 0.01)  | -0.04 (-0.16 to 0.09)  | -0.04 (-0.10 to 0.02) | -0.01 (-0.20 to 0.18)  | 0.01 (-0.46 to 0.48)  | -0.03 (-0.31 to 0.24)  | 0.05 (-0.07 to 0.18)   |
| % observed agreement (95 % CI), Kappa                                                | 86%(77 to 93), 0.82    | 92%(84 to 97), 0.89    | 80%(77 to 88), 0.74    | 93%(85 to 97), 0.91   | 74%(63 to 83), 0.67    | 80%(77 to 88), 0.74   | 87%(78 to 93), 0.83    | 91%(82 to 96),0.88     |
| % in Lower/Higher Risk category                                                      | 7 / 7 %                | 6 / 2 %                | 19 / 1 %               | 6 / 1 %               | 25 / 1 %               | 19 / 1 %              | 9 / 4 %                | 4 / 6 %                |
| % Exceeding TE Goal                                                                  | 15 %                   | 8 %                    | 20 %                   | 9 %                   | 39 %                   | 29 %                  | 13 %                   | 7 %                    |
| Non-Fasting (≤ 12 hours): dLDL-C versus rLDL-C (TG < 2.26 mmol/L (200 mg/dL)) (N=58) |                        |                        |                        |                       |                        |                       |                        |                        |
|                                                                                      | Denka                  | Kyowa                  | Roche                  | Sekisui               | Serotec                | Sysmex                | UMA                    | Wako                   |
| R <sup>2</sup>                                                                       | 0.97                   | 0.98                   | 0.98                   | 0.98                  | 0.98                   | 0.96                  | 0.75                   | 0.98                   |
| S <sub>YX</sub> mmol/L                                                               | 0.06                   | 0.06                   | 0.06                   | 0.05                  | 0.05                   | 0.11                  | 0.22                   | 0.05                   |
| Slope (95 % CI) mmol/L                                                               | 1.04 (1.00 to 1.09)    | 1.01 (0.96 to 1.06)    | 0.96 (0.92 to 1.00)    | 1.01 (0.97 to 1.04)   | 0.93 (0.89 to 0.98)    | 0.91 (0.72 to 1.11)   | 1.11 (0.90 to 1.33)    | 0.96 (0.93 to 1.00)    |
| Intercept (95 % CI) mmol/L                                                           | -0.10 (-0.18 to -0.01) | -0.06 (-0.18 to 0.05)  | -0.06 (-0.16 to 0.03)  | -0.04 (-0.12 to 0.04) | -0.07 (-0.17 to 0.04)  | 0.01 (-0.46 to 0.48)  | -0.37 (-0.88 to 0.13)  | 0.12 (0.03 to 0.21)    |
| % observed agreement (95 % CI), Kappa                                                | 88%(77 to 95), 0.83    | 88%(77 to 95), 0.83    | 79%(67 to 89), 0.71    | 88%(77 to 95), 0.83   | 72%(59 to 83), 0.62    | 85%(73 to 93), 0.78   | 85%(73 to 93), 0.79    | 93%(83 to 98), 0.90    |
| % in Lower/Higher Risk category                                                      | 3 / 9 %                | 10 / 2 %               | 21 / 0 %               | 9 / 3 %               | 28 / 0 %               | 16 / 0 %              | 9 / 7 %                | 3 / 3 %                |
| % Exceeding TE Goal                                                                  | 3 %                    | 3 %                    | 14 %                   | 2 %                   | 28 %                   | 21 %                  | 16 %                   | 3 %                    |
| Fasting (> 12 hours): cLDL-C versus rLDL-C (TG < 2.26 mmol/L (200 mg/dL)) (N=85)     |                        |                        |                        |                       |                        |                       |                        |                        |
|                                                                                      | Denka                  | Kyowa                  | Roche                  | Sekisui               | Serotec                | Sysmex                | UMA                    | Wako                   |
| R <sup>2</sup>                                                                       | 0.98                   | 0.99                   | 0.98                   | 0.98                  | 0.98                   | 0.97                  | 0.97                   | 0.97                   |
| S <sub>YX</sub> mmol/L                                                               | 0.08                   | 0.08                   | 0.08                   | 0.08                  | 0.08                   | 0.09                  | 0.09                   | 0.11                   |
| Slope (95 % CI) mmol/L                                                               | 0.98 (0.90 to 1.07)    | 0.97 (0.82 to 1.11)    | 1.00 (0.92 to 1.09)    | 1.00 (0.88 to 1.11)   | 1.00 (0.89 to 1.11)    | 0.99 (0.87 to 1.11)   | 0.95 (0.80 to 1.10)    | 0.94 (0.68 to 1.21)    |
| Intercept (95 % CI) mmol/L                                                           | -0.04 (-0.24 to 0.16)  | -0.04 (-0.37 to 0.29)  | -0.06 (-0.26 to 0.13)  | -0.02 (-0.28 to 0.24) | -0.04 (-0.29 to 0.21)  | 0.01 (-0.27 to 0.30)  | 0.04 (-0.31 to 0.40)   | -0.04 (-0.65 to 0.58)  |
| % observed agreement (95 % CI), Kappa                                                | 89%(81 to 95), 0.86    | 88%(79 to 94), 0.85    | 93%(85 to 97), 0.91    | 91%(82 to 96), 0.88   | 91%(82 to 96), 0.88    | 89%(81 to 95), 0.86   | 88%(79 to 94), 0.85    | 85%(75 to 92), 0.80    |
| % in Lower/Higher Risk category                                                      | 7 / 4 %                | 9 / 2 %                | 4 / 4 %                | 4 / 6 %               | 4 / 6 %                | 2 / 8 %               | 7 / 5 %                | 13 / 2 %               |
| % Exceeding TE Goal                                                                  | 15 %                   | 15 %                   | 13 %                   | 11 %                  | 11 %                   | 11 %                  | 12 %                   | 25 %                   |
| Non-Fasting (≤ 12 hours): cLDL-C versus rLDL-C (TG < 2.26 mmol/L (200 mg/dL)) (N=58) |                        |                        |                        |                       |                        |                       |                        |                        |
|                                                                                      | Denka                  | Kyowa                  | Roche                  | Sekisui               | Serotec                | Sysmex                | UMA                    | Wako                   |
| R <sup>2</sup>                                                                       | 0.98                   | 0.98                   | 0.99                   | 0.98                  | 0.99                   | 0.98                  | 0.92                   | 0.98                   |
| S <sub>YX</sub> mmol/L                                                               | 0.05                   | 0.05                   | 0.05                   | 0.06                  | 0.05                   | 0.06                  | 0.15                   | 0.06                   |
| Slope (95 % CI) mmol/L                                                               | 1.00 (0.95 to 1.05)    | 1.03 (0.99 to 1.08)    | 1.04 (1.00 to 1.09)    | 1.04 (0.99 to 1.09)   | 1.06 (1.02 to 1.10)    | 1.06 (1.01 to 1.11)   | 1.17 (0.98 to 1.35)    | 1.07 (1.01 to 1.12)    |
| Intercept (95 % CI) mmol/L                                                           | -0.09 (-0.22 to 0.04)  | -0.19 (-0.31 to -0.07) | -0.15 (-0.27 to -0.02) | -0.11 (-0.24 to 0.02) | -0.18 (-0.28 to -0.07) | -0.12 (-0.25 to 0.00) | -0.55 (-1.01 to -0.08) | -0.32 (-0.46 to -0.17) |
| % observed agreement (95 % CI), Kappa                                                | 93%(83 to 98), 0.90    | 88%(77 to 95), 0.83    | 97%(88 to 100), 0.95   | 95%(86 to 99), 0.93   | 97% (88 to 100), 0.95  | 90%(79 to 96), 0.86   | 78%(65 to 88), 0.69    | 81%(69 to 90), 0.74    |
| % in Lower/Higher Risk category                                                      | 7 / 0 %                | 12 / 0 %               | 2 / 2 %                | 2 / 3 %               | 0 / 3 %                | 10 / 0 %              | 16 / 7 %               | 19 / 0 %               |
| % Exceeding TE Goal                                                                  | 7 %                    | 10 %                   | 5 %                    | 3 %                   | 3 %                    | 7 %                   | 17 %                   | 24 %                   |

\*cLDL-C was calculated using direct HDL-C from each indicated manufacturer (2 participants with unsure fasting status excluded from analysis)
